# Supplementary material
Source: publisher figshare collection journal article supplement (https://frontiersin.figshare.com/ndownloader/files/25559222)
Supplement: Supplementary file [file 25559222]

**Supplement Table 4. Altered (and common) proteins among different concentrations of Aquamin®**

| Proteins                                                                                             | Aquamin    |            |            |            |
|------------------------------------------------------------------------------------------------------|------------|------------|------------|------------|
|                                                                                                      | 1.5mM      | 2.1mM      | 3.0mM      | 4.5mM      |
| <b>Proteins common with all 4 concentrations (Aquamin 1.5, 2.1, 3.0, 4.5 mM) (3 common proteins)</b> |            |            |            |            |
| Cadherin-17                                                                                          | *2.83±0.22 | *2.95±0.60 | *3.24±0.67 | *3.62±0.70 |
| Desmoglein-2                                                                                         | *2.07±0.17 | *2.10±0.25 | *2.28±0.37 | *2.36±0.40 |
| Ly6/PLAUR domain-containing protein 8                                                                | *2.12±0.22 | *2.14±0.50 | *2.46±0.40 | *2.64±0.93 |
| <b>Proteins common with 3 concentrations (Aquamin 2.1, 3.0, 4.5 mM) (6 common proteins)</b>          |            |            |            |            |
| Calcium-activated chloride channel regulator 4                                                       | *2.03±0.28 | *2.24±0.51 | *2.31±0.27 | *3.01±0.74 |
| Natural resistance-associated macrophage protein 2                                                   | *1.91±0.42 | *2.20±0.43 | *2.56±0.36 | *2.68±0.54 |
| CEACAM7                                                                                              | *1.84±0.32 | *2.00±0.08 | *2.23±0.37 | *2.44±0.50 |
| Fibrinogen silencer-binding protein                                                                  | *0.61±0.09 | *0.44±0.10 | *0.36±0.03 | *0.22±0.13 |
| Neurogranin                                                                                          | *0.54±0.05 | *0.38±0.16 | *0.30±0.13 | *0.18±0.09 |
| Stathmin                                                                                             | *0.58±0.07 | *0.47±0.02 | *0.37±0.01 | *0.29±0.12 |
| <b>Proteins common with 2 concentrations (Aquamin 3.0, 4.5 mM) (21 common proteins)</b>              |            |            |            |            |
| Zinc transporter ZIP4                                                                                | *2.01±0.55 | *2.08±0.46 | *2.63±0.77 | *2.83±0.96 |
| Apolipoprotein A-I                                                                                   | 1.62±0.61  | *1.96±0.46 | *2.39±0.28 | *2.68±0.30 |
| Nuclear receptor subfamily 0 group B member 1                                                        | 2.59±1.13  | 5.71±3.91  | 4.69±2.45  | 6.68±4.11  |
| Protein RRP5 homolog (NF-kappa-B-binding protein)                                                    | *0.72±0.03 | *0.54±0.12 | *0.44±0.15 | *0.41±0.06 |
| DNA replication licensing factor MCM3                                                                | *0.70±0.07 | *0.57±0.06 | *0.44±0.07 | *0.34±0.13 |
| Heterogeneous nuclear ribonucleoprotein D-like                                                       | *0.69±0.06 | *0.59±0.02 | *0.50±0.04 | *0.42±0.11 |
| Serine/arginine-rich splicing factor 6                                                               | *0.67±0.15 | *0.56±0.11 | *0.47±0.10 | *0.37±0.10 |
| Nucleophosmin                                                                                        | *0.59±0.06 | *0.55±0.06 | *0.43±0.04 | *0.35±0.09 |
| Proliferating cell nuclear antigen                                                                   | *0.65±0.01 | *0.59±0.08 | *0.45±0.05 | *0.36±0.10 |
| Nucleolar RNA helicase 2                                                                             | *0.63±0.07 | *0.52±0.12 | *0.43±0.06 | *0.34±0.04 |
| Proliferation marker protein Ki-67                                                                   | *0.58±0.08 | *0.48±0.11 | *0.39±0.13 | *0.31±0.08 |
| Nuclear autoantigenic sperm protein                                                                  | *0.66±0.07 | *0.57±0.03 | *0.45±0.03 | *0.37±0.11 |
| U3 small nucleolar RNA-interacting protein 2                                                         | *0.62±0.03 | *0.51±0.06 | *0.38±0.01 | *0.32±0.10 |
| SWI/SNF complex subunit SMARCC1                                                                      | *0.69±0.08 | *0.54±0.07 | *0.48±0.04 | *0.41±0.13 |
| Translation machinery-associated protein 7                                                           | *0.63±0.07 | *0.57±0.10 | *0.49±0.06 | *0.44±0.09 |
| Nucleolin                                                                                            | *0.70±0.09 | *0.57±0.02 | *0.48±0.04 | *0.41±0.11 |
| Inosine-5'-monophosphate dehydrogenase 2                                                             | *0.63±0.03 | *0.56±0.13 | *0.43±0.11 | *0.35±0.12 |
| Nucleolar and coiled-body phosphoprotein 1                                                           | *0.63±0.05 | *0.53±0.06 | *0.44±0.06 | *0.37±0.10 |
| PC4 and SFRS1-interacting protein                                                                    | *0.72±0.10 | *0.56±0.05 | *0.48±0.05 | *0.41±0.12 |
| Receptor-type tyrosine-protein phosphatase F                                                         | *0.56±0.09 | *0.55±0.11 | *0.50±0.08 | *0.45±0.07 |
| Cytokine-induced protein with coiled-coil domain                                                     | *0.69±0.02 | *0.52±0.13 | *0.45±0.10 | *0.42±0.11 |
| <b>Proteins unique to 1 concentration (Aquamin 2.1 mM) (7 proteins)</b>                              |            |            |            |            |
| Aminopeptidase N                                                                                     | *1.91±0.21 | *2.01±0.25 | *1.85±0.27 | *2.00±0.36 |
| Meprin A subunit alpha                                                                               | *1.91±0.36 | *2.02±0.27 | *2.32±0.71 | 2.37±0.96  |
| CEACAM1                                                                                              | 1.72±0.52  | 5.25±4.20  | 2.01±1.12  | 1.80±1.18  |
| CEACAM 5                                                                                             | 1.37±0.29  | *2.37±0.51 | 1.81±0.79  | 1.71±0.82  |
| CEACAM 6                                                                                             | 1.25±0.35  | *2.13±0.35 | 1.50±0.78  | 1.33±0.80  |
| Leucine zipper putative tumor suppressor 1                                                           | 0.92±0.26  | 1.54±1.98  | 1.98±2.19  | 1.46±0.98  |
| Cyclic AMP-dependent transcription factor ATF-7                                                      | *1.37±0.13 | *2.25±0.37 | *1.76±0.45 | 1.74±0.57  |
| <b>Proteins unique to 1 concentration (Aquamin 3.0 mM) (1 protein)</b>                               |            |            |            |            |
| Integrin alpha-5                                                                                     | *1.69±0.42 | *1.80±0.26 | *2.21±0.58 | *2.27±0.67 |
| <b>Proteins unique to 1 concentration (Aquamin 4.5 mM) (33 proteins)</b>                             |            |            |            |            |
| Sodium/glucose cotransporter 1                                                                       | *1.40±0.16 | *1.73±0.10 | *1.94±0.37 | *2.20±0.28 |
| Laminin subunit alpha-1                                                                              | *2.00±0.62 | *2.15±0.38 | *2.00±0.49 | *2.59±0.44 |
| Laminin subunit beta-1                                                                               | *2.14±0.70 | *2.20±0.48 | *2.12±0.56 | *2.85±0.42 |
| Laminin subunit beta-2                                                                               | *1.91±0.49 | *2.03±0.34 | *1.90±0.30 | *2.32±0.30 |
| Laminin subunit gamma-1                                                                              | *2.03±0.58 | *2.07±0.37 | *2.01±0.47 | *2.68±0.30 |
| Nidogen-1 (Entactin)                                                                                 | 1.70±0.49  | *1.66±0.37 | *1.72±0.37 | *2.11±0.28 |
| HMG-CoA synthase, mitochondrial                                                                      | *1.52±0.12 | *1.74±0.23 | *1.95±0.22 | *2.09±0.18 |
| ENPP3                                                                                                | *1.41±0.15 | *1.60±0.18 | *1.81±0.19 | *2.04±0.25 |

|                                                    |            |            |            |            |
|----------------------------------------------------|------------|------------|------------|------------|
| Copper-transporting ATPase 2                       | 1.39±0.52  | *1.62±0.22 | *1.94±0.16 | *2.28±0.04 |
| Beta-glucuronidase                                 | *1.29±0.06 | *1.51±0.23 | *1.51±0.17 | *2.00±0.27 |
| Keratin, type I cytoskeletal 16                    | 0.93±0.32  | 0.72±0.37  | 0.57±0.42  | 1.37±0.91  |
| Ribosome biogenesis protein BMS1 homolog           | 0.92±0.32  | 0.79±0.34  | *0.61±0.15 | *0.49±0.04 |
| Ras GTPase-activating protein-binding protein 1    | *0.75±0.07 | *0.61±0.10 | *0.55±0.09 | *0.47±0.10 |
| HEAT repeat-containing protein 1                   | *0.69±0.17 | *0.64±0.08 | *0.55±0.07 | *0.43±0.03 |
| DNA replication licensing factor MCM4              | *0.70±0.02 | *0.67±0.09 | *0.52±0.07 | *0.43±0.10 |
| Non-histone chromosomal protein HMG-17             | *0.73±0.05 | *0.55±0.18 | *0.49±0.16 | *0.43±0.13 |
| Ribosome biogenesis protein WDR12                  | *0.77±0.11 | *0.67±0.10 | *0.58±0.04 | *0.47±0.05 |
| DNA replication licensing factor MCM5              | *0.70±0.10 | *0.57±0.18 | *0.49±0.16 | *0.40±0.13 |
| Probable 28S rRNA (NOP2)                           | *0.74±0.06 | *0.60±0.09 | *0.51±0.06 | *0.43±0.12 |
| Nucleolar GTP-binding protein 2                    | *0.59±0.01 | *0.64±0.15 | *0.55±0.04 | *0.30±0.08 |
| Putative RNA-binding protein Luc7-like 1           | *0.69±0.07 | *0.72±0.11 | *0.58±0.15 | *0.47±0.07 |
| CD44 antigen                                       | *0.61±0.01 | *0.58±0.12 | *0.48±0.12 | *0.40±0.09 |
| DNA replication licensing factor MCM7              | *0.77±0.08 | 0.74±0.23  | *0.56±0.23 | *0.41±0.12 |
| Palmitoyl-protein thioesterase 1                   | *0.66±0.03 | *0.63±0.05 | *0.60±0.03 | *0.49±0.05 |
| CD99 antigen                                       | *0.78±0.03 | *0.64±0.10 | *0.59±0.10 | *0.39±0.04 |
| Pumilio homolog 3                                  | 0.78±0.25  | *0.70±0.06 | *0.46±0.14 | *0.33±0.19 |
| Heterogeneous nuclear ribonucleoprotein A0         | *0.71±0.09 | *0.55±0.19 | *0.49±0.20 | *0.39±0.16 |
| DNA replication licensing factor MCM2              | *0.70±0.06 | *0.62±0.16 | *0.47±0.15 | *0.32±0.11 |
| Importin subunit alpha-1                           | *0.70±0.08 | *0.66±0.11 | *0.57±0.05 | *0.48±0.04 |
| Ribonucleoside-diphosphate reductase large subunit | *0.68±0.06 | *0.56±0.21 | *0.46±0.14 | *0.35±0.15 |
| Serine/threonine-protein kinase VRK1               | *0.70±0.07 | *0.61±0.11 | *0.52±0.11 | *0.41±0.12 |
| Gem-associated protein 5                           | *0.82±0.11 | *0.65±0.13 | *0.53±0.16 | *0.47±0.11 |
| Transformer-2 protein homolog beta                 | 0.85±0.24  | *0.56±0.07 | *0.53±0.04 | *0.48±0.06 |

These values represent average fold change (of abundance ratio) compared to the control condition (0.25mM calcium) ± SD. These proteins were up-regulated by 1.8-fold or greater across the three colonoids (subjects). \*Represents significance in up- or down-regulation as compared to the control at  $p < 0.05$  level. These data are also shown in Supplementary Figure 3.
